# Supplementary material for: A red thermally activated delayed fluorescence material as a triplet sensitizer for triplet–triplet annihilation up-conversion with high efficiency and low energy loss
Source: Royal Society of Chemistry journal article supplement (doi:10.1039/c7tc04096b), 2017-01-01
Supplement: c7tc04096b1.pdf [file c7tc04096b1.pdf]

## Electronic Supplementary information

### Red thermally activated delayed fluorescence material as triplet sensitizer for triplet-triplet annihilation up-conversion with high efficiency and low energy loss

Danqing Wei,<sup>a</sup> Fan Ni,<sup>a</sup> Zece Zhu<sup>b</sup>, Yang Zou<sup>c</sup> and Chuluo Yang<sup>\*a</sup>

<sup>a</sup> Hubei Key Lab on Organic and Polymeric Optoelectronic Materials, Department of Chemistry, Wuhan University, Wuhan, 430072, People's Republic of China. \*E-mail: [clyang@whu.edu.cn](mailto:clyang@whu.edu.cn)

<sup>b</sup> Wuhan National Laboratory for Optoelectronics & School of Optical and Electronic Information, Huazhong University of Science and Technology, Wuhan 430074, China.

<sup>c</sup> Shenzhen Key Laboratory of Polymer Science and Technology, College of Materials Science and Engineering, Shenzhen University, Shenzhen, 518060, People's Republic of China

#### General Information

Absorption spectra were recorded on a SHIMADZU UV-2700 spectrophotometer. Fluorescence spectra were measured by using a HITACHI F-4600 fluorescence spectrometer. Up-converted emission spectra were recorded on HITACHI F-4600 with the excitation source using an external, adjustable, continuous semiconductor laser (532 nm, LSR532H-2W). The luminescence decay was carried out on CHI FLS-920 with the laser of 377 nm.

### **Determination of the $\Phi_{ISC}$ of BTZ-DMAC**

The  $\Phi_{ISC}$  of BTZ-DMAC was calculated according to following formula:

$$\phi_{ISC} = \frac{\phi_{DF}}{\phi_{DF} + \phi_{PF}} = \frac{R_{DF}\phi}{\phi} = R_{DF}$$

Where  $\Phi_{ISC}$ ,  $\Phi_{DF}$ ,  $\Phi_{PF}$  and  $R_{DF}$  represent the efficiency of ISC, the quantum yield of delayed fluorescence, the quantum yield of promoted fluorescence and the proportion of delayed fluorescence, respectively.

### **Determination of TTA-UC quantum yield**

The TTA-UC quantum yield in deaerated benzene was calculated relative to a standard. Rhodamine 6G in ethanol (0.1  $\mu\text{M}$ ,  $\Phi_{std} = 95\%$ ).

$$\Phi_{UC} = \Phi_{std} (A_{std} / A_{UC})(I_{UC} / I_{std}) = 0.5\Phi_{UC}$$

Where  $\Phi$ ,  $A$ , and  $I$  represent the quantum yield, absorbance at 532 nm, and integrated fluorescence spectral profile.

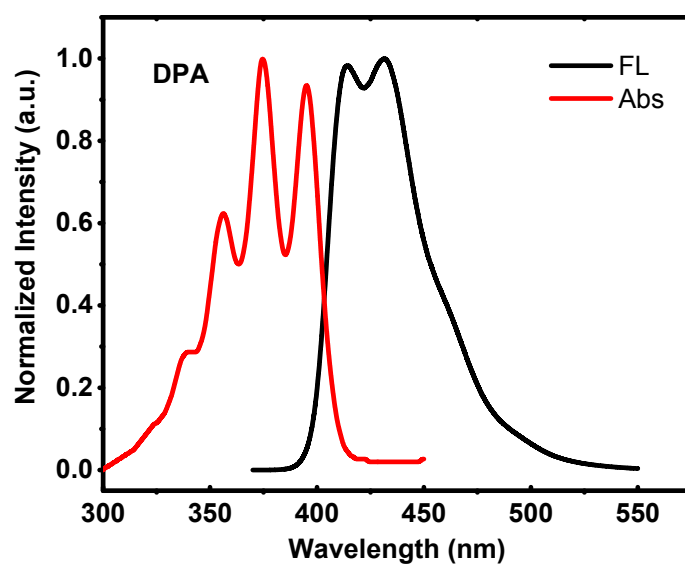

**Fig. S1** The absorption and emission spectra of DPA (5 mM) in toluene.

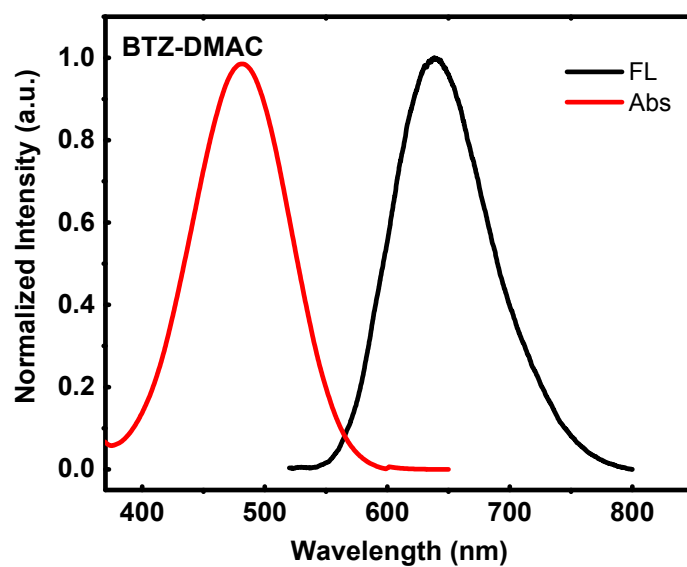

**Fig. S2** The absorption and emission spectra of BTZ-DMAC (1 mM) in toluene.
